# Supplementary material for: PTT-quant: a new method for direct identification and absolute quantification of premature transcription termination events, following the example of bacterial riboswitches
Source: PubMed Central journal article supplement (PMC8882085; doi:10.1007/s00253-022-11809-1), 2022-02-05
Supplement: 253_2022_11809_MOESM1_ESM.pdf [file 253_2022_11809_MOESM1_ESM.pdf]

## **Applied Microbiology and Biotechnology**

### **PTT-quant - a new method for direct identification and absolute quantification of premature transcription termination events, following the example of bacterial riboswitches**

Piotr Machtel, Anna Wasilewska-Burczyk, Julian Zacharjusz, Kamilla Grzywacz\*

Institute of Bioorganic Chemistry Polish Academy of Sciences, Poznań, Poland

\*corresponding author:

Email: [kamilla.grzywacz@ibch.poznan.pl](mailto:kamilla.grzywacz@ibch.poznan.pl)

Phone: +48/618291864

Fax: +48/618528503

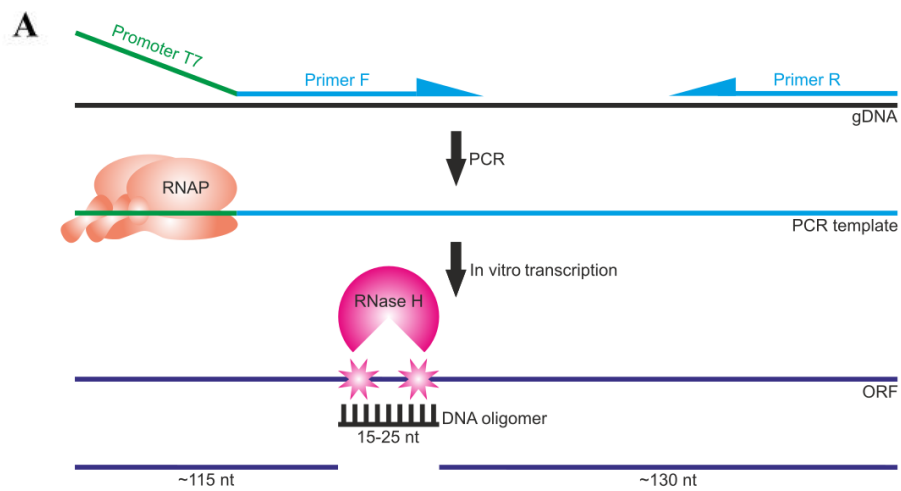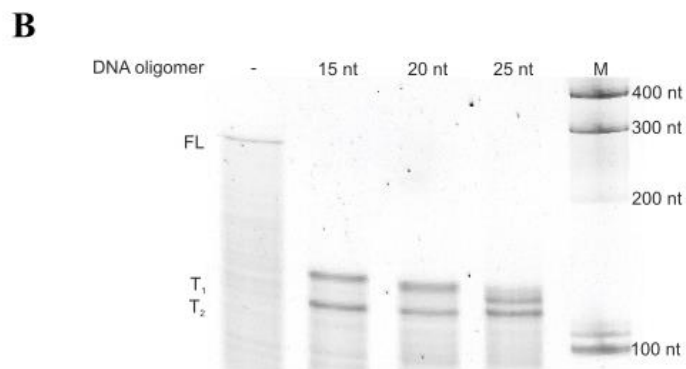

**Figure S1. RNase H cleavage of *gyrA* in vitro transcripts with different DNA oligomers: 15 nt, 20 nt and 25 nt long.**

Schematic representation of RNase H nucleolytic activity for in vitro transcripts (A) and the experimental results of RNase H activity (B).

M – RNA size marker, FL – full-length transcript, T<sub>1</sub> and T<sub>2</sub> – products of RNase H cleavage. „-” – control sample without DNA oligomer.

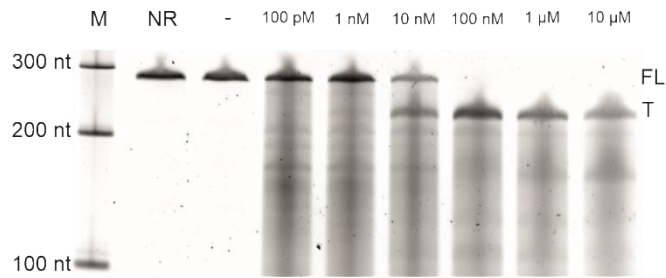

**Figure S2. RNase H cleavage of *metE* in vitro transcripts in a growing gradient of a DNA oligomer.**

M – RNA size marker, NR - no reaction, "-" – control reaction with no DNA oligomer, FL – full-length transcript, T - RNase H cleavage product.

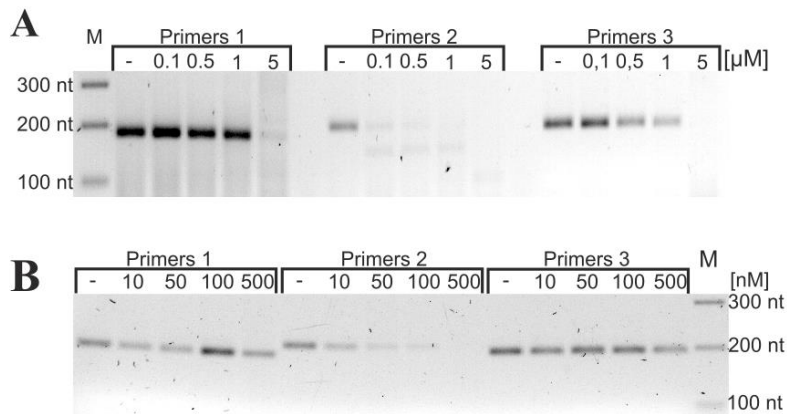

**Figure S3. *gyrA* transcripts are efficiently cleaved by RNase H ex vivo in a broad range of DNA oligomer concentrations.**

RNase H cleavage of *gyrA* transcripts in the pool of *ex vivo* transcripts was performed in a gradient of DNA oligomer concentrations: 0.1-5  $\mu$ M (A) and 10-500 nM (B). A clear disappearance of the signals from products amplified solely by primers 2 (F2/R2) is observed, which indicates specific RNase H cleavage. The signals derived from the PCR products of primers 1 and 3 are not significantly decreased.

M - DNA size marker.

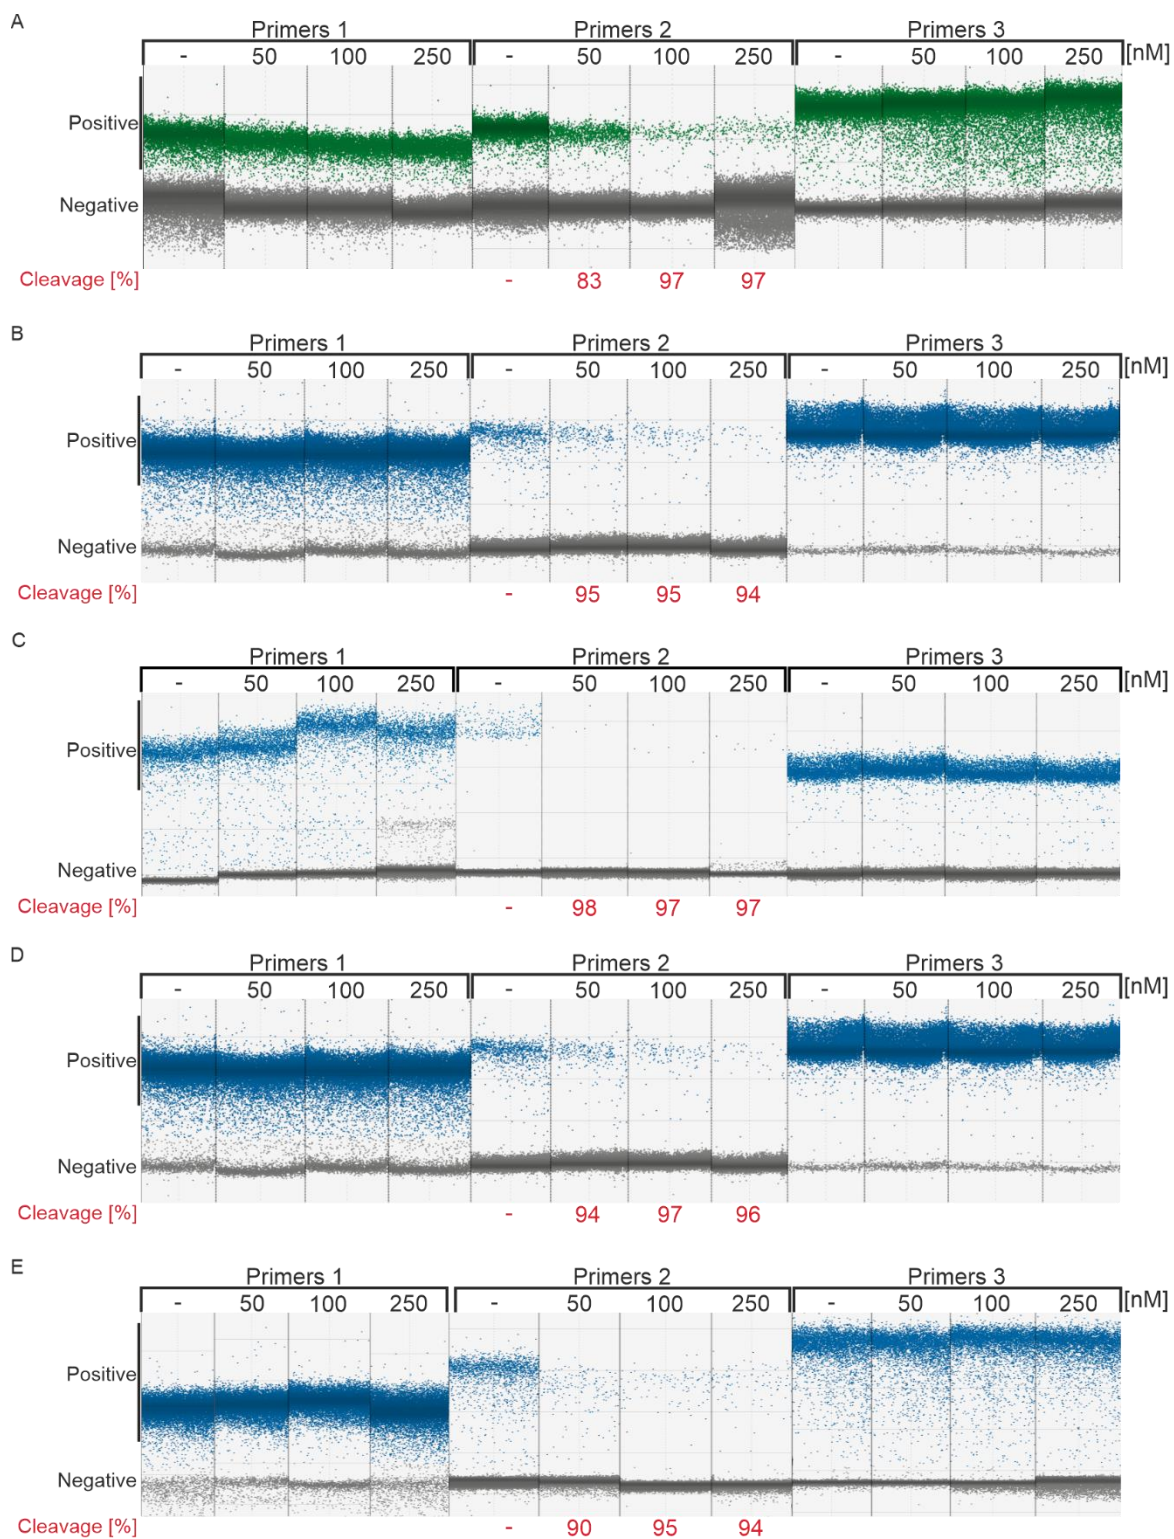

**Figure S4. ddPCR result of ex vivo SAM riboswitch-containing transcript after RNase H cleavage: *gyrA* (A), *samT* (B), *metE* (C), *metIC* (D) and *mtnKA* (E).**

For each set of primers (primers 1, 2 and 3), a DNA oligomer gradient from 0 nM (-) to 250 nM was applied. Positive droplets are marked as green dots, negative - as gray dots. Positive droplets, due to the presence of the EvaGreen fluorescent dye, emit light only with PCR reaction product inside. The higher input concentration of a given transcript, the more copies of the cDNA and the greater the number of positive versus negative droplets.

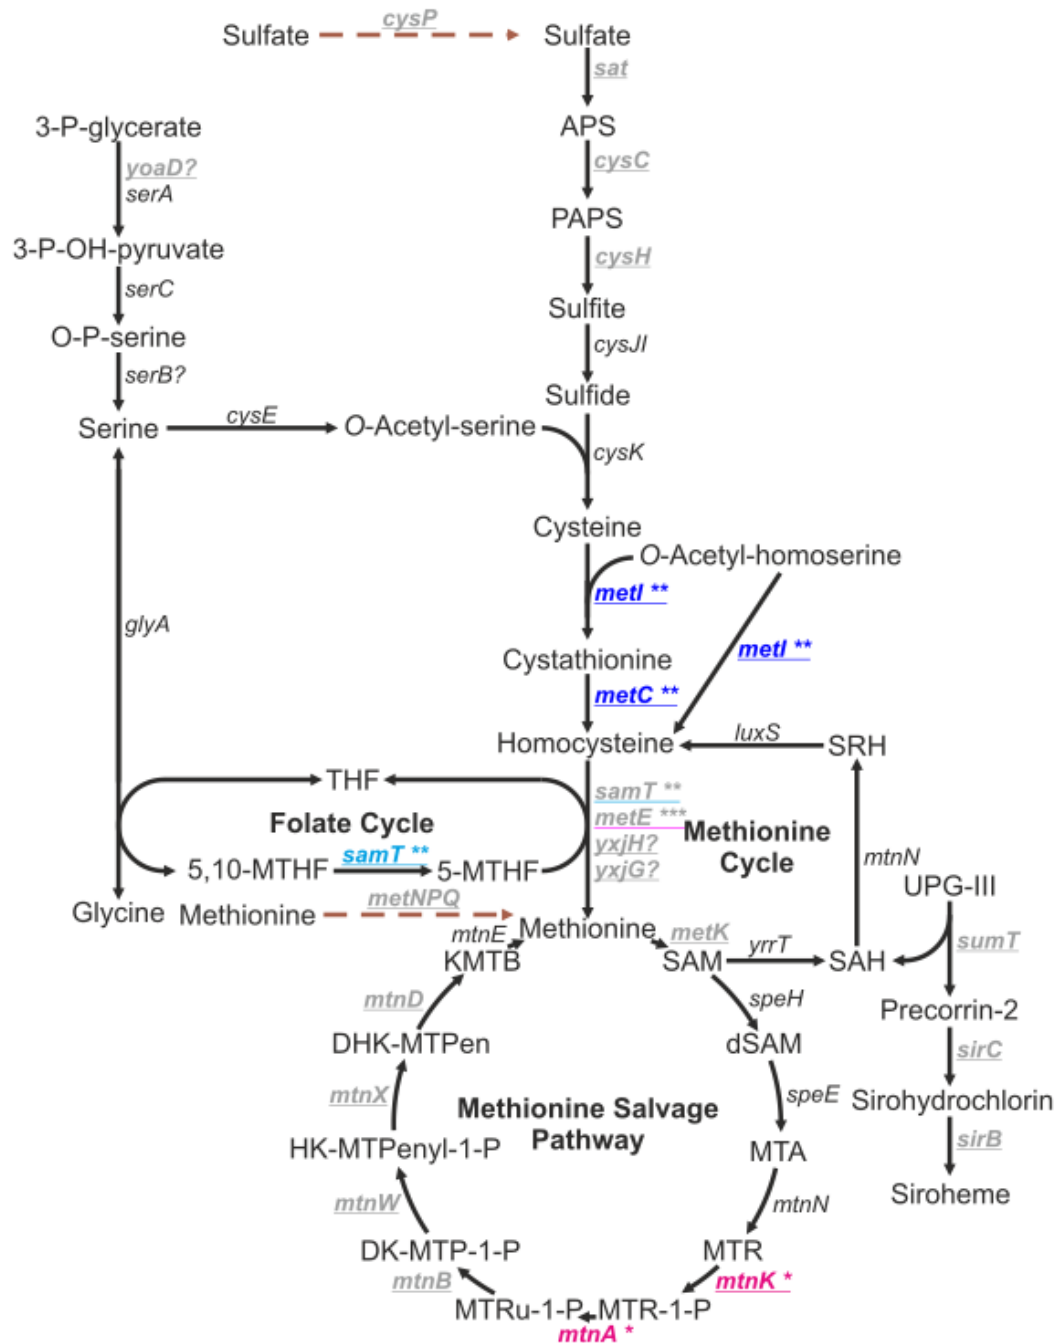

**Figure S5. Methionine biosynthesis and metabolism pathway.**

Underlined and bold and genes are controlled by SAM-I riboswitch. Browned, dashed arrows – methionine import. APS – adenosine-5'-phosphosulfate. PAPS – 3'-phosphoadenosine-5'-phosphosulfate. THF – tetrahydrofolate. MTHF – methyl-THF. SAM – S-adenosylmethionine. dSAM – decarboxylated SAM. SAH – S-adenosylhomocysteine. SRH – S-ribulosehomocysteine. MTA – 5'-methyladenosine. MTR – 5'-methylthioribose. MTR-1-P – MTR-1-phosphate. MTRu-1-P – 5-methylthioribulose-1-phosphate. DK-MTP-1-P – 2,3-diketo-5-methylthiopentan-1-phosphate. HK-MTPenyl-1-P – 2-hydroksy-3-keto-5-methylthiopentenyl-1-phosphate. DHK-MTPen-1-P – 1,2-dihydroksy-3-keto-5-methylthiopenten-1-phosphate. KMTB – 2-keto-4-methylthiobutyrate. UPG-III – uroporphyrinogen-III. Asterisks corresponds with induction ratio: \*\*\* – high induction, \*\* – average induction, \* – weak induction.

**Table S1.** Primers used for PCR, ddPCR and RT-qPCR reaction.

| <b>Gene</b>  | <b>Primer name</b> | <b>5'-3' sequence</b>      | <b>Length</b> |
|--------------|--------------------|----------------------------|---------------|
| <i>gyrA</i>  | gyrA F1            | ATGAGTGAACAAAACACACCAC     | 22 nt         |
|              | gyrA R1            | GCTTGTCACTTGTCATGCCT       | 20 nt         |
|              | gyrA F2            | GCATGACAAGTGACAAGCCT       | 20 nt         |
|              | gyrA R2            | TCTGTATAACGCATGGCCGC       | 20 nt         |
|              | gyrA F3            | CCGAGAACAACGGCCAATA        | 20 nt         |
|              | gyrA R3            | GCAACATGCTCTTCTTCTGCC      | 21 nt         |
| <i>samT</i>  | samT F1            | ACACGAAAATTTTCATATCCGTTCT  | 24 nt         |
|              | samT R1            | TGTCCTCTTCTTATCTTCCAAGCTGT | 25 nt         |
|              | samT F2            | AAGCTCGAACAGCTTGGGAAGA     | 21 nt         |
|              | samT R2            | TAGGAGTAGAGGAGCGTCCC       | 20 nt         |
|              | samT F3            | GCCCATGCCGGTGAAGATAA       | 20 nt         |
|              | samT R3            | ATGATGTGAGCTCAGCGGTT       | 20 nt         |
| <i>metIC</i> | metIC F1           | CGATATTTCTTATCGTGAGAGGTGG  | 25 nt         |
|              | metIC R1           | CGCTTCTTCTTATCTTCCAAGCA    | 23 nt         |
|              | metIC F2           | TCAGCAACCGGCTTGTTTTG       | 20 nt         |
|              | metIC R2           | CTTCATCGCTACGGTTCCCA       | 20 nt         |
|              | metIC F3           | GGATATTCCTGAAGAGATCCGCA    | 23 nt         |
|              | metIC R3           | GCTCCCTCTTTGACCTGACA       | 20 nt         |
| <i>metE</i>  | metE F1            | CTCTTATCGAGAGTTGGGCGAG     | 22 nt         |
|              | metE R1            | ACGTAAAACACTGCCTCTCTCA     | 22 nt         |
|              | metE F2            | AGGGATTGGCCTTTTGACCC       | 20 nt         |
|              | metE R2            | AAACACTCTCTTTCACCCGC       | 20 nt         |
|              | metE F3            | AATCGGACTGAACCGGGAAT       | 20 nt         |
|              | metE R3            | TCAACTGGATCCCGAAACGG       | 20 nt         |
| <i>mtnKA</i> | mtnKA F1           | TTATCGAGAGTTGGGCGAGG       | 20 nt         |
|              | mtnKA R1           | ACATCTATGTCCGCCTCTCTT      | 21 nt         |
|              | mtnKA F2           | TTCCATTGTGAAATGGGGCG       | 20 nt         |
|              | mtnKA R2           | CCACAGCGGAGCTTTCATTT       | 20 nt         |
|              | mtnKA F3           | AGAAGCAATCGGATTTGCGG       | 20 nt         |
|              | mtnKA R3           | GTTTTGAATTCCGAACGTTTTTCG   | 24 nt         |

**Table S2.** DNA oligomers used for RNase H cleavage reaction.

| <b>Gene</b>  | <b>Oligomer name</b>    | <b>5'-3' sequence</b>      | <b>Lenght</b> |
|--------------|-------------------------|----------------------------|---------------|
| <i>gyrA</i>  | <i>gyrA</i> oligomer 15 | GCTGAATCACCGTGC            | 15 nt         |
|              | <i>gyrA</i> oligomer 20 | ATACCGCTGAATCACCGTGC       | 20 nt         |
|              | <i>gyrA</i> oligomer 25 | TTCATATACCGCTGAATCACCGTGC  | 25 nt         |
| <i>samT</i>  | <i>samT</i> oligomer    | GCCTCCTTTATTCACATCAGCAAG   | 24 nt         |
| <i>metIC</i> | <i>metIC</i> oligomer   | TTATTTTGAAAAGGGAAGGT       | 20 nt         |
| <i>metE</i>  | <i>metE</i> oligomer    | GGCTGCTAAGAGGTTTTCTCAC     | 22 nt         |
| <i>mtnKA</i> | <i>mtnKA</i> oligomer   | TTATGTAATTAATTAATATGTGGCCG | 26 nt         |

**Table S3. The absolute concentrations of the riboswitch-containing transcripts at different time points of methionine starvation.**

The concentration expressed in copies of RNA per  $\mu\text{l}$  [ $\text{c}/\mu\text{l}$ ] was calculated for the prematurely terminated (T) and full-length (FL) transcripts. PTT ratio was calculated as the ratio of the concentrations between the full-length and prematurely terminated transcripts, according to the formula on Fig.4. DNA oligomer + (A) and DNA oligomer – (B) conditions are presented.

**A**

| Gene         | Met | 0 h   |       |       |           | 1 h    |        |        |           | 2 h    |        |        |           | 3 h    |        |       |           |
|--------------|-----|-------|-------|-------|-----------|--------|--------|--------|-----------|--------|--------|--------|-----------|--------|--------|-------|-----------|
|              |     | FL+T  | T     | FL    | PTT ratio | FL+T   | T      | FL     | PTT ratio | FL+T   | T      | FL     | PTT ratio | FL+T   | T      | FL    | PTT ratio |
| <i>samT</i>  | –   | 6 120 | 6 075 | 45    | 0.0074    | 7 480  | 6 653  | 827    | 0.1243    | 1 531  | 550    | 981    | 1.7836    | 1 998  | 966    | 1 032 | 1.0683    |
|              | +   | 5 490 | 5 454 | 36    | 0.0066    | 5 360  | 5 221  | 139    | 0.0266    | 2 102  | 1 907  | 195    | 0.1023    | 1 610  | 1 451  | 159   | 0.1096    |
| <i>metIC</i> | –   | 4 940 | 4 659 | 281   | 0.0603    | 31 350 | 28 595 | 2 755  | 0.0963    | 8 490  | 3 010  | 5 480  | 1.8206    | 14 190 | 12 584 | 1 606 | 0.1276    |
|              | +   | 4 270 | 4 067 | 203   | 0.0499    | 16 190 | 15 171 | 1 019  | 0.0672    | 9 550  | 8 923  | 627    | 0.0703    | 10 140 | 9 201  | 939   | 0.1021    |
| <i>metE</i>  | –   | 5 870 | 5 686 | 184   | 0.0324    | 25 770 | 18 920 | 6 850  | 0.3621    | 32 390 | 11 360 | 21 030 | 1.8512    | 12 220 | 3 560  | 8 660 | 2.4326    |
|              | +   | 6 330 | 6 165 | 165   | 0.0268    | 23 750 | 22 670 | 1 080  | 0.0476    | 13 140 | 12 617 | 523    | 0.0415    | 14 140 | 13 080 | 1 060 | 0.0810    |
| <i>mtnKA</i> | –   | 2 780 | 670   | 2 110 | 3.1493    | 15 700 | 5 550  | 10 150 | 1.8288    | 7 390  | 4 640  | 2 750  | 0.5927    | 15 840 | 12 490 | 3 350 | 0.2682    |
|              | +   | 2 700 | 610   | 2 090 | 3.4262    | 17 240 | 9 690  | 7 550  | 0.7792    | 10 740 | 7 320  | 3 420  | 0.4672    | 5 530  | 3 610  | 1 920 | 0.5319    |

**B**

| Gene         | Met | 0 h   |       |      |           | 1 h    |        |       |           | 2 h    |        |        |           | 3 h    |        |      |           |
|--------------|-----|-------|-------|------|-----------|--------|--------|-------|-----------|--------|--------|--------|-----------|--------|--------|------|-----------|
|              |     | FL+T  | T     | FL   | PTT ratio | FL+T   | T      | FL    | PTT ratio | FL+T   | T      | FL     | PTT ratio | FL+T   | T      | FL   | PTT ratio |
| <i>samT</i>  | –   | 6 230 | 6 196 | 33.8 | 0.0055    | 9 830  | 9 014  | 816   | 0.0905    | 1 709  | 734    | 975    | 1.3283    | 2 387  | 1 268  | 1119 | 0.8825    |
|              | +   | 6 700 | 6 662 | 37.7 | 0.0057    | 6 100  | 5 954  | 146   | 0.0245    | 1 983  | 1 821  | 162    | 0.0890    | 1 790  | 1 634  | 156  | 0.0955    |
| <i>metIC</i> | –   | 4 600 | 4 385 | 215  | 0.0490    | 35 590 | 33 159 | 2431  | 0.0733    | 8 190  | 3 600  | 4 590  | 1.2750    | 11 500 | 10 253 | 1247 | 0.1216    |
|              | +   | 4 190 | 4 006 | 184  | 0.0459    | 15 040 | 14 036 | 1004  | 0.0715    | 9 950  | 9 270  | 680    | 0.0734    | 9 890  | 8 877  | 1013 | 0.1141    |
| <i>metE</i>  | –   | 8 320 | 8 133 | 187  | 0.0230    | 29 550 | 23 410 | 6140  | 0.2623    | 33 640 | 15 450 | 18 190 | 1.1773    | 15 270 | 6 720  | 8550 | 1.2723    |
|              | +   | 7 660 | 7 501 | 159  | 0.0212    | 28 750 | 27 490 | 1260  | 0.0458    | 16 890 | 16 372 | 518    | 0.0316    | 17 190 | 16 100 | 1090 | 0.0677    |
| <i>mtnKA</i> | –   | 2 840 | 810   | 2030 | 2.5062    | 18 750 | 8 320  | 10430 | 1.2536    | 8 440  | 5 420  | 3 020  | 0.5572    | 18 190 | 14 340 | 3850 | 0.2685    |
|              | +   | 2 960 | 830   | 2130 | 2.5663    | 20 110 | 12 380 | 7730  | 0.6244    | 11 840 | 7 740  | 4 100  | 0.5297    | 5 300  | 3 160  | 2140 | 0.6772    |



**Table S4. The C<sub>t</sub> values of the riboswitch-containing transcripts at different time points of methionine starvation.**

The C<sub>t</sub> values was calculated for the prematurely terminated (T) and full-length (FL) transcripts and presented as ± standard deviation (SD) from three independent experiments.

| Gene              | Me<br>t | 0 h                              |                                | 0.5 h                            |                                | 1 h                              |                                | 2 h                              |                                | 4 h                              |                                |
|-------------------|---------|----------------------------------|--------------------------------|----------------------------------|--------------------------------|----------------------------------|--------------------------------|----------------------------------|--------------------------------|----------------------------------|--------------------------------|
|                   |         | FL+T<br>[C <sub>t</sub> ]±S<br>D | FL<br>[C <sub>t</sub> ]±S<br>D | FL+T<br>[C <sub>t</sub> ]±S<br>D | FL<br>[C <sub>t</sub> ]±S<br>D | FL+T<br>[C <sub>t</sub> ]±S<br>D | FL<br>[C <sub>t</sub> ]±S<br>D | FL+T<br>[C <sub>t</sub> ]±S<br>D | FL<br>[C <sub>t</sub> ]±S<br>D | FL+T<br>[C <sub>t</sub> ]±S<br>D | FL<br>[C <sub>t</sub> ]±S<br>D |
| <i>metE</i>       | -       | 28.54<br>±0.12                   | 33.25<br>±0.48                 | 24.51<br>±0.25                   | 31.59<br>±0.03                 | 23.21<br>±0.23                   | 34.43<br>±0.02                 | 23.91<br>±0.63                   | 31.19<br>±0.17                 | 22.03<br>±0.09                   | 31.8<br>±0.23                  |
|                   | +       | 29.83<br>±0.16                   | 32.63<br>±0.07                 | 26.9<br>±0.19                    | 34.87<br>±0.54                 | 24.8<br>±0.02                    | 38.38<br>±0.11                 | 26.12<br>±0.09                   | 33.43<br>±0.02                 | 18.86<br>±0.12                   | 32.39<br>±0.69                 |
| <i>mtnK<br/>A</i> | -       | 28.53<br>±0.02                   | 33.35<br>±0.14                 | 24.27<br>±0.15                   | 32.13<br>±0.06                 | 20.74<br>±0.04                   | 34.17<br>±0.2                  | 25.55<br>±0.28                   | 32.88<br>±0.11                 | 25.87<br>±0.18                   | 32.02<br>±0.16                 |
|                   | +       | 30.27<br>±0.1                    | 32.78<br>±0.07                 | 27.73<br>±0.27                   | 34.19<br>±0.32                 | 20.95<br>±0.01                   | 35.15<br>±0.1                  | 25.93<br>±0.22                   | 33.88<br>±0.16                 | 26.9<br>±0.06                    | 32.84<br>±0.04                 |

**Table S5. IR\* results achieved by ddPCR and RT-qPCR for *metE* and *mtnKA*.**

| Gene         | Method  | 0 h       | 1 h       | 2 h        | 3 h        |
|--------------|---------|-----------|-----------|------------|------------|
|              |         | IR*±SD    | IR*±SD    | IR*±SD     | IR*±SD     |
| <i>metE</i>  | ddPCR   | 1.13±0.11 | 6.38±0.75 | 18.12±2.55 | 9.90±0.63  |
| <i>mtnKA</i> | ddPCR   | 0.95±0.04 | 1.91±0.62 | 1.22±0.07  | 0.56±0.07  |
| <i>metE</i>  | RT-qPCR | 0.27±0.12 | 1.00±0.79 | 15.50±1.80 | 12.80±4.60 |
| <i>mtnKA</i> | RT-qPCR | 0.21±0.04 | 1.53±0.29 | 1.96±0.30  | 0.87±0.27  |
